# Supplementary material for: Crosstalk between Yeast Cell Plasma Membrane Ergosterol Content and Cell Wall Stiffness under Acetic Acid Stress Involving Pdr18
Source: MDPI journal article supplement (doi:10.3390/jof8020103), 2022-01-21
Supplement: s1 [file s1]

## **Supplementary Material**

**Crosstalk between yeast cell plasma membrane ergosterol content and cell wall stiffness under acetic acid stress involving**

**Pdr18**

Ricardo A Ribeiro, Cláudia P. Godinho, Miguel V. Vitorino,  
Tiago T. Robalo, Fábio Fernandes, Mário S. Rodrigues,  
Isabel Sá-Correia\*

**\*Corresponding author:** [isacorreia@tecnico.ulisboa.pt](mailto:isacorreia@tecnico.ulisboa.pt)

**Figure S1** – Calibration curves of SNARF-4F-5-(and-6)-carboxylic acid, acetoxymethyl ester, acetate. The calibration curves for parental and *pdr18Δ* populations convert the fluorescence ratio to pHi values. They were obtained by plotting the fluorescence ratio of the different samples as a function of the pH of the buffer, with a defined pHi, in which they were incubated. The equations obtained result from the fitting of a second-order polynomial function.

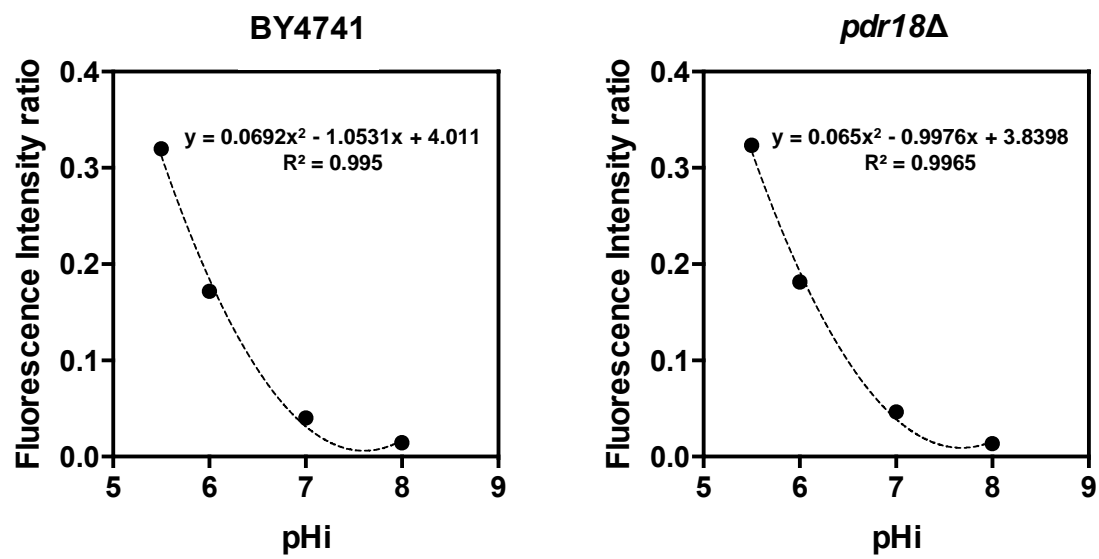

**Figure S2** – Lyticase susceptibility assays using cells of the parental and *pdr18Δ* strains harvest during the growth curve in the absence or presence of acetic acid. The decrease of the OD<sub>600nm</sub> during the incubation time of yeast cell suspensions (in %) following the addition of lyticase is plotted.

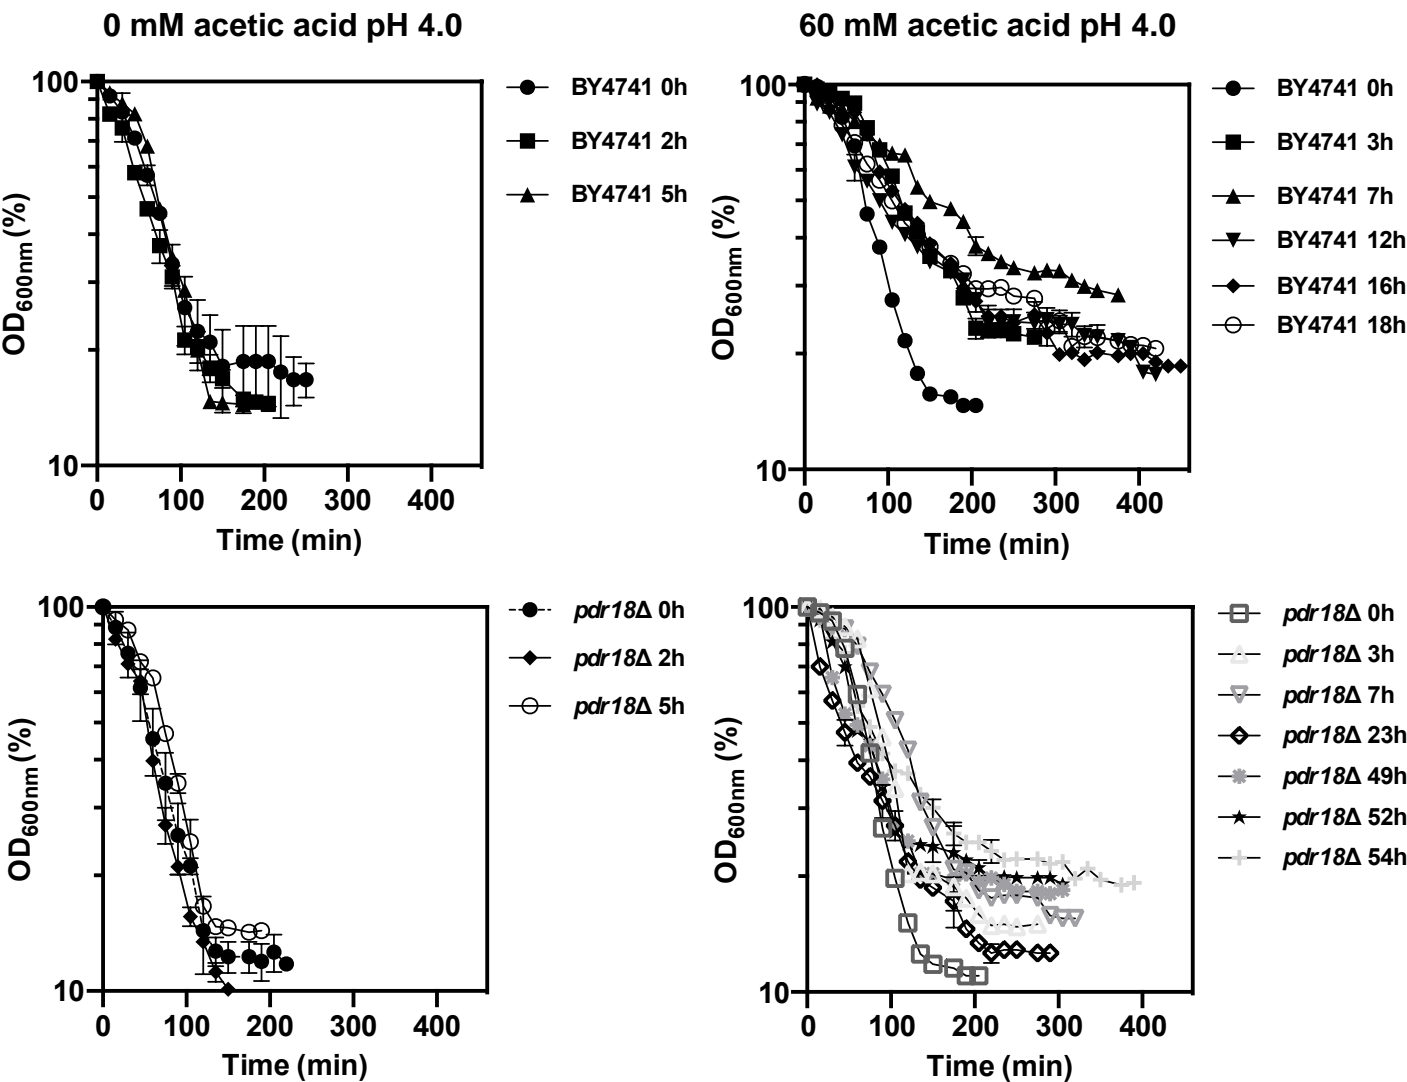

**Figure S3** – Fluorescence microscopy images of fluorescence-stained cell wall  $\beta$ -glucans, chitin and mannans. Illustrative images of stained *pdr18* $\Delta$  cells were taken after 0 hours (A) and 23 hours (B) of exposure to acetic acid, this corresponding to the middle of the acetic acid-induced latency. Confocal microscopy was used to quantify  $\beta$ -glucans and mannans stained with Fc-Dectin 1-Alexa 633 and Concanavalin A-FITC, respectively, and 2-photon excitation microscopy was used to quantify chitin stained with Calcofluor White.

**A**

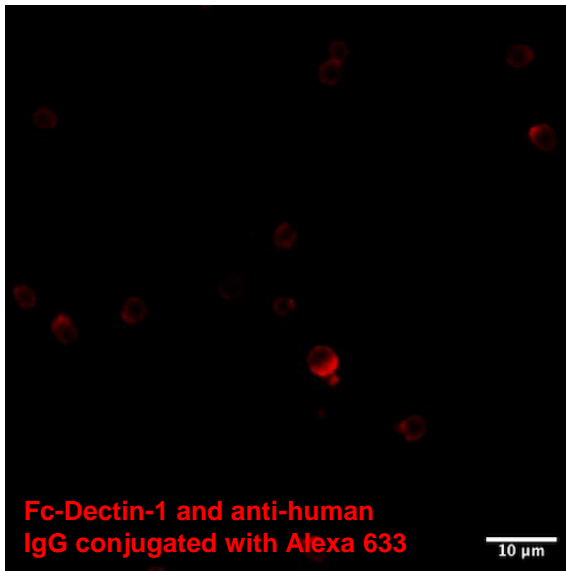

**B**

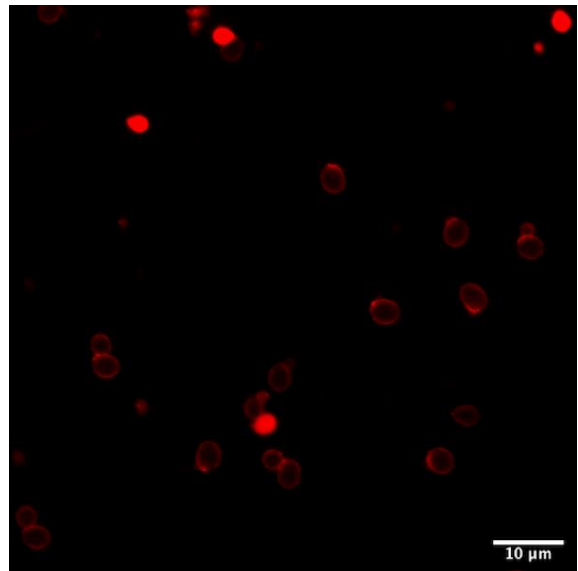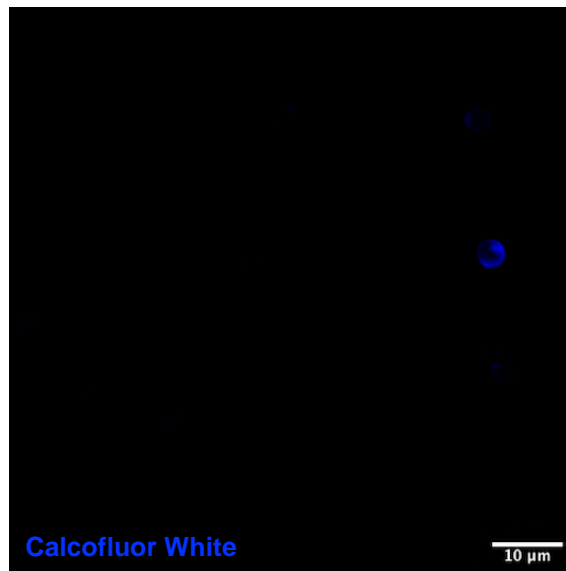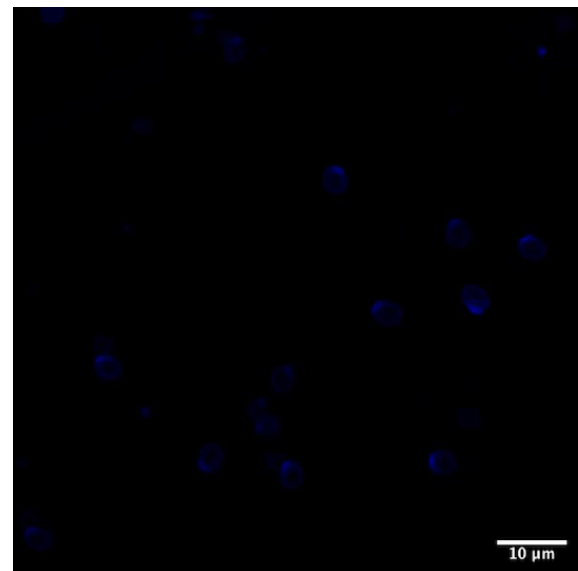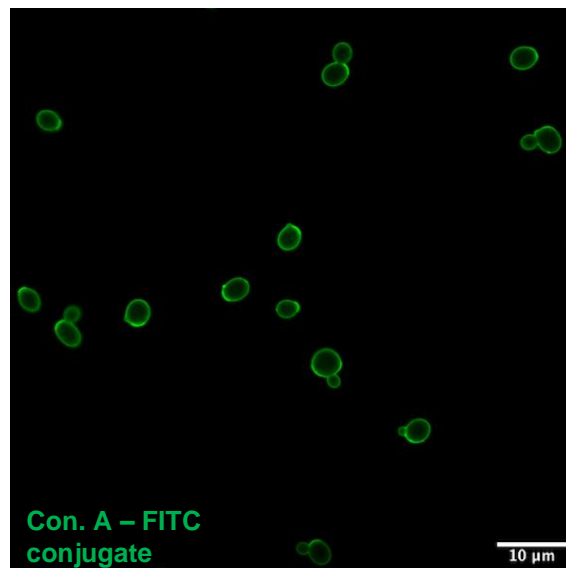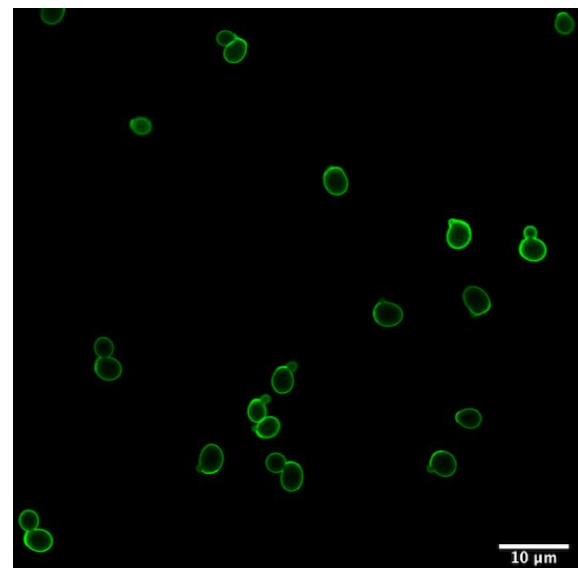

**Table S1** - Primers used for qRT-PCR analysis.

| Primer      | Sequence (5'-3')             |
|-------------|------------------------------|
| <i>ACT1</i> | fw: CTCCACCACTGCTGAAAGAGAA   |
|             | rev: CCAAGGCGACGTAACATAGTTTT |
| <i>CHS3</i> | fw: TCACCTGGATGTTTTACCATCAAG |
|             | rev: CCACTCCGACGAGTTGCAT     |
| <i>FKS1</i> | fw: CATGCTGCTCTGGTCCCTTATT   |
|             | rev: CACCGTGGGCAATTCCA       |
| <i>FKS2</i> | fw: GCTCATGTCGTTGGAGCAGTT    |
|             | rev: CCAATGGCATTACGGAAAAGA   |
| <i>RLM1</i> | fw: CTTTTTCTGCAACACAGCCATA   |
|             | rev: CGCCAGGAATATTCGATGGT    |
| <i>GAS1</i> | fw: AACCGCTGCTGCTTTTTTTTG    |
|             | rev: CTTCAATCGCTGGAACATCGT   |
| <i>CRH1</i> | fw: CGCGGCTGCCGAAAG          |
|             | rev: GCA GTGCTAGAAGCTGCAGTTG |
| <i>BGL2</i> | fw: TTTTGTATGGCTAACGCGTTCT   |
|             | rev: GAGTAAGAGGCATTTTGCATGGT |
| <i>PRM5</i> | fw: TTTTCCACACAACATACCCAGTTT |
|             | rev: TCTTTGGCGGGATAATCCATA   |
